# Supplementary material
Source: MDPI journal article supplement (https://www.mdpi.com/2504-477X/5/7/166)
Supplement: s1 [file s1]

## Supporting Information: Study on indium (III) oxide/aluminium thermite energetic composites

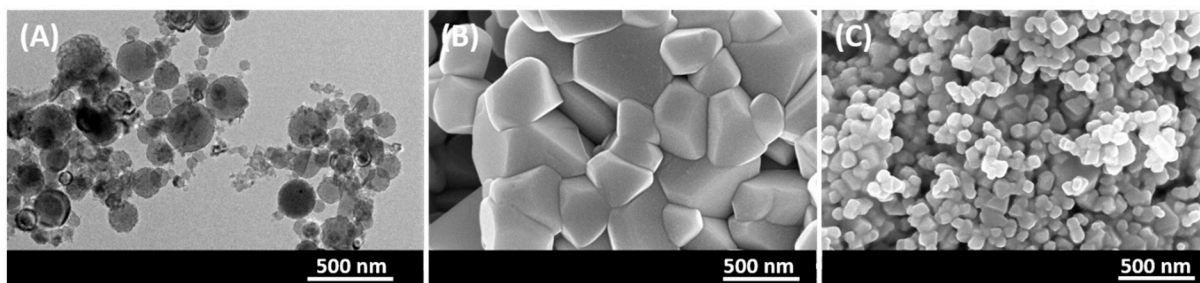

**Figure S1:** Microstructure of the individual powders (A) aluminium (Al) and indium (III) oxide (B) micro, and (C) nanopowders, respectively.

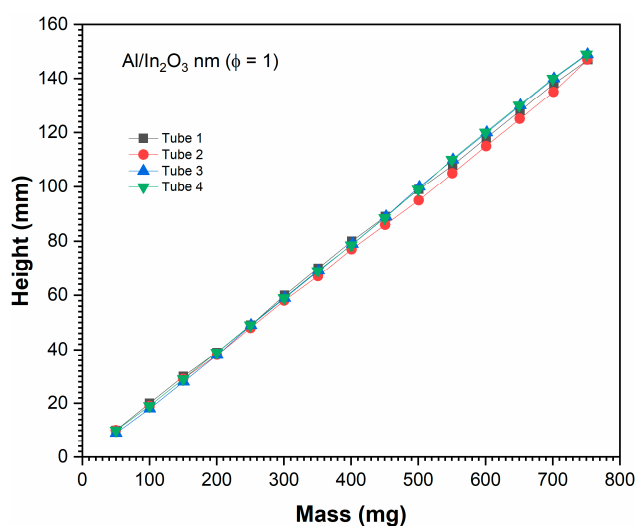

**Figure S2:** Filling up height as function of mass added for the thermite Al/In<sub>2</sub>O<sub>3</sub>\_nm energetic composite ( $\phi = 1$ , series of 4 tubes). For the sake of clarity, lines are plotted.

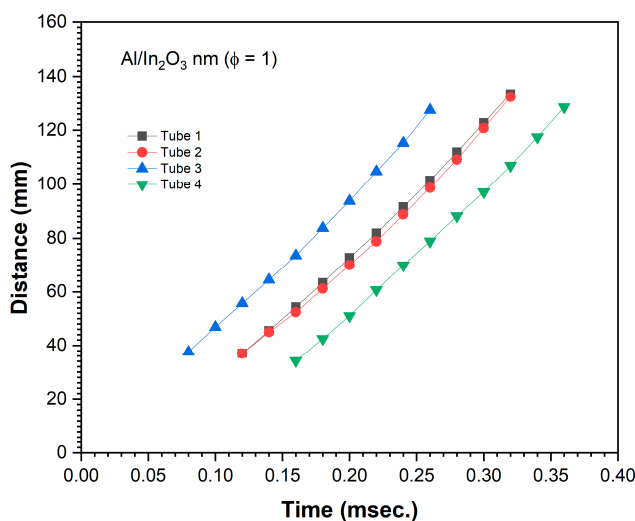

**Figure S3:** Filling up height as function of mass added for the thermite Al/In<sub>2</sub>O<sub>3</sub>\_nm energetic composite ( $\phi = 1$ , series of 4 tubes). For the sake of clarity, lines are plotted.
